# Supplementary material for: Mulberry (Morus alba L.) Fruit Extract Ameliorates Inflammation via Regulating MicroRNA-21/132/143 Expression and Increases the Skeletal Muscle Mitochondrial Content and AMPK/SIRT Activities
Source: MDPI journal article supplement (doi:10.3390/antiox10091453), 2021-09-13
Supplement: s1 [file s1]

## Supplementary Materials

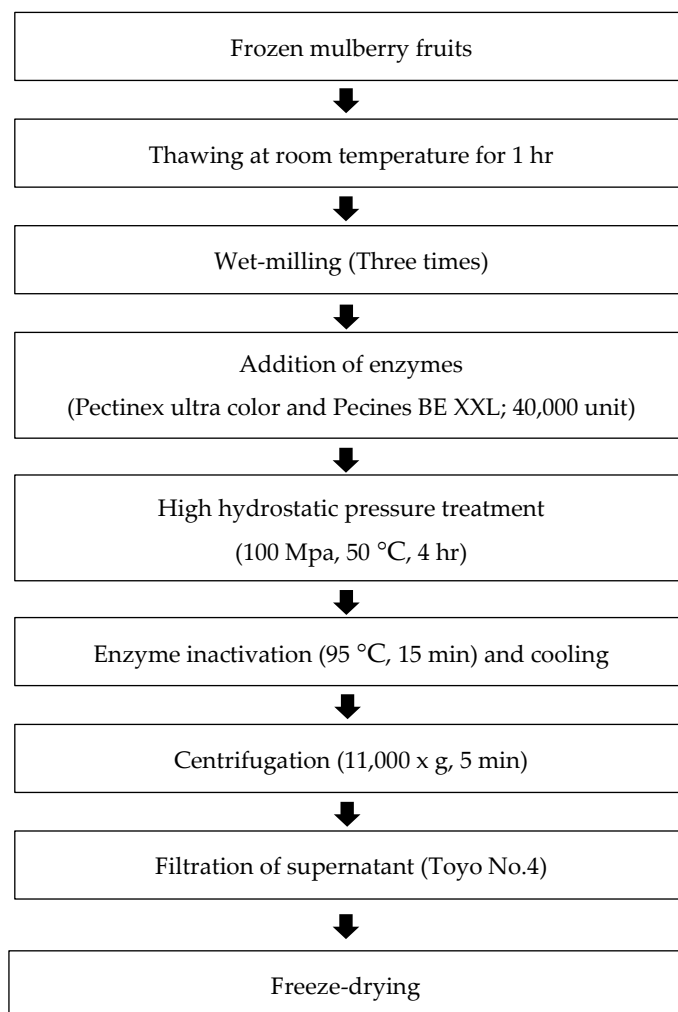

**Figure S1.** Schematic illustration of the preparation method for mulberry fruit extract (ME).

**Table S1.** The composition of experimental diets.

| <b>Ingredient (g/kg)</b> | <b>LFD <sup>1</sup></b> | <b>HFD <sup>2</sup></b> | <b>ME-L</b> | <b>ME-H</b> |
|--------------------------|-------------------------|-------------------------|-------------|-------------|
| Casein                   | 140                     | 170.73                  | 170.73      | 170.73      |
| L-Cystine                | 1.8                     | 2.2                     | 2.2         | 2.2         |
| Corn starch              | 495.692                 | 201.71                  | 196.71      | 191.71      |
| Maltodextrin             | 125                     | 155                     | 155         | 155         |
| Sucrose                  | 100                     | 121.95                  | 121.95      | 121.95      |
| Cellulose                | 50                      | 60.98                   | 60.98       | 60.98       |
| Soybean oil              | 40                      | -                       | -           | -           |
| Lard                     | -                       | 229.5                   | 229.5       | 229.5       |
| Mineral mix <sup>3</sup> | 35                      | 42.68                   | 42.68       | 42.68       |
| Vitamin mix <sup>4</sup> | 10                      | 12.2                    | 12.2        | 12.2        |
| Choline bitartrate       | 2.5                     | 3.05                    | 3.05        | 3.05        |
| ME                       | -                       | -                       | 5           | 10          |
| Total                    | 1,000                   | 1,000                   | 1,000       | 1,000       |
| Fat (Kcal %)             | 10                      | 45                      | 45          | 45          |
| Energy (Kcal/g)          | 3.6                     | 4.6                     | 4.6         | 4.6         |

<sup>1</sup> AIN-93G purified rodent diet with slight modification.

<sup>2</sup> Modified AIN-93G purified rodent diet with 45% energy from lard.

<sup>3</sup> AIN-93G mineral mix.

<sup>4</sup> AIN-93 vitamin mix.

LFD, Low-fat diet; HFD, high-fat diet; ME-L, HFD + 5 g/kg diet of high hydrostatic pressure extract of mulberry fruit; ME-H, HFD + 10 g/kg diet of high hydrostatic pressure extract of mulberry fruit.

**Table S2.** Primers used for quantitative reverse-transcriptase polymerase chain reaction.

| Gene           | Accession number | Primer sequences (5'- 3')                              | Product size (bp) |
|----------------|------------------|--------------------------------------------------------|-------------------|
| $\beta$ -actin | NM_031144        | F: GGCACCACACTTTCTACAAT<br>R: AGGTCTCAAACATGATCTGG     | 123               |
| PPAR $\gamma$  | NM_001145366     | F: TGTGGGGATAAAGCATCAGG<br>R: CAAGGCACTTCTGAAACCGA     | 175               |
| STEBP-1c       | AF286470.2       | F: AGGAGGCCATCTTGTTGCTT<br>R: GTTTTGACCCTTAGGGCAGC     | 134               |
| aP2            | NM_053365        | F: TCACCCCAGATGACAGGAAA<br>R: CATGACACATTCCACCACCA     | 140               |
| F4/80          | NM_001007557     | F: GATTGGTCCCTTGGCAAGCA<br>R: ATCTCGTACCTGGCGGTTGA     | 109               |
| NOS2           | XM_006246949     | F: TCCTGCCACCTTGGAGTTCA<br>R: TGGTCACCTCCAGCACAAGA     | 152               |
| CD68           | NM_001031638     | F: ATCATTTGGCCTGGTCCTCCTG<br>R: GGGCTGGTAGGTTGATTGTCTG | 87                |
| CD11c          | XM_006230382     | F: CAGAACCCGTCCACCCAATG<br>R: GATGTACAGCGGAAGTGCA      | 129               |
| ARG1           | NM_017134        | F: ACATCGGCTTGCGAGATGTG<br>R: GCCAATTCCCAGCTTGTCCA     | 101               |
| CD163          | XM_017592651     | F: GCTGGCGTGACATGTTCTGA<br>R: AAACCACGTCGGCATCTGTC     | 151               |
| TNF- $\alpha$  | NM_012675        | F: CCCCTTTATCGTCTACTCCT<br>R: ACTACTTCAGCGTCTCGTGT     | 139               |
| IL-6           | NM_012589        | F: ATAGTCCTTCCTACCCCAAC<br>R: TGCCGAGTAGACCTCATAGT     | 143               |
| MCP1           | NM_031530        | F: ACTCACCTGCTGCTACTCAT<br>R: CTACAGCTTCTTTGGGACAC     | 101               |
| SIRT1          | XM_008772947     | F: AGGGAACCTCTGCCTCATCT<br>R: GAGGTGTTGGTGGCAACTCT     | 199               |
| PGC1- $\alpha$ | NM_031347        | F: GCACCAGAAAACAGCTCCAA<br>R: TTAAGTGAAGTTGCCATCCCCG   | 130               |
| CPT-1 $\beta$  | NM_013200        | F: TGTAAGTAGCGAGTCCACGGC<br>R: GGTGTTTTTCGGAGGCTTTC    | 100               |
| UCP3           | NM_013167        | F: CAGTGACCTGTGCTCAACCC<br>R: CCACAGTCCCCTGACTCCTT     | 146               |

PPAR- $\gamma$ , peroxisome proliferator-activated receptor- $\gamma$ ; SREBP-1c, sterol regulatory element-binding protein-1c; aP2, adipocyte protein 2; NOS2, nitric oxide synthase 2; ARG1, arginase 1; CD, cluster of differentiation; TNF- $\alpha$ , tumor necrosis factor- $\alpha$ ; IL-6, interleukin 6; MCP1, monocyte chemoattractant protein 1; SIRT1, sirtuin 1; PGC-1 $\alpha$ , peroxisome proliferator-activated receptor gamma coactivator 1 $\alpha$ ; CPT-1 $\beta$ , carnitine palmitoyltransferase 1 $\beta$ ; UCP3, uncoupling protein 3.
